# Supplementary material
Source: publisher site journal article supplement (https://www.dovepress.com/article/463918)
Supplement: Supplementary file 1 [file get_supplementary_file.php]

**Table S1 Peak area of each peak after the plasma samples were treated with** **different volumes of β-glucosidase**

| Enzyme dosage | Metabolite Ⅰ  [mAU*s] | | | Metabolite Ⅱ  [mAU*s] | | | Curcumin  [mAU*s] | | | ∆ Metabolite Ⅰ  [mAU*s] | ∆ Metabolite Ⅱ  [mAU*s] | ∆Curcumin  [mAU*s] | **∆ Metabolite Ⅱ/∆**  **Curcumin** |
| --- | --- | --- | --- | --- | --- | --- | --- | --- | --- | --- | --- | --- | --- |
| Peak area | average | SD | Peak area | average | SD | Peak area | average | SD |
| 0μL | 169.2184 | 102.0316 | 58.6327 | 854.4708 | 596.6568 | 223.3117 | 2.6720 | 3.1660 | 0.6459 | / | / | / | / |
| 75.6659 | 471.8840 | 2.9291 |
| 61.2105 | 463.6156 | 3.8968 |
| 1μL | 48.7509 | 35.8115 | 11.6412 | 315.1789 | 250.1503 | 56.7835 | 296.1140 | 326.1294 | 35.6476 | -66.2201 | -346.5065 | 322.9635 | **-1.07** |
| 32.4954 | 224.9035 | 316.7434 |
| 26.1881 | 210.3685 | 365.5309 |
| 2μL | 30.67252 | 21.6565 | 7.8084 | 77.62789 | 67.9020 | 9.3332 | 440.8454 | 469.2862 | 43.7556 | -80.3751 | -528.7548 | 466.1203 | **-1.13** |
| 17.0844 | 67.05958 | 447.3419 |
| 17.2125 | 59.01861 | 519.6714 |
| 5μL | 27.1970 | 24.6273 | 2.2333 | 30.70957 | 33.0266 | 2.5306 | 609.1490 | 609.1450 | 25.8528 | -77.4042 | -563.6302 | 605.9791 | **-0.93** |
| 23.5305 | 32.64323 | 583.2902 |
| 23.1545 | 35.72697 | 634.9958 |

**Notes:** the concentration of the metabolites (mainly Metabolite Ⅱ) was calculated using the conversion factor of 1.


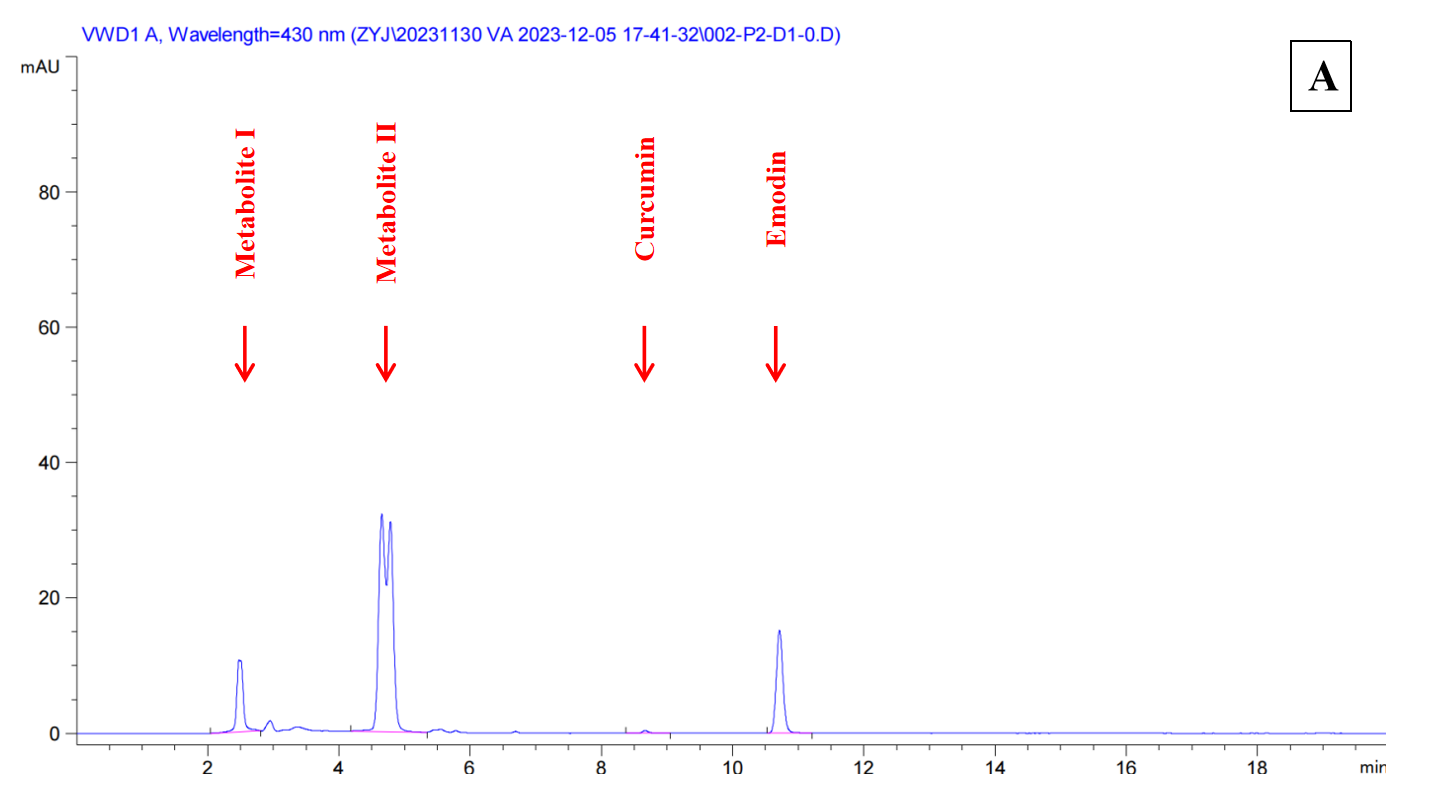


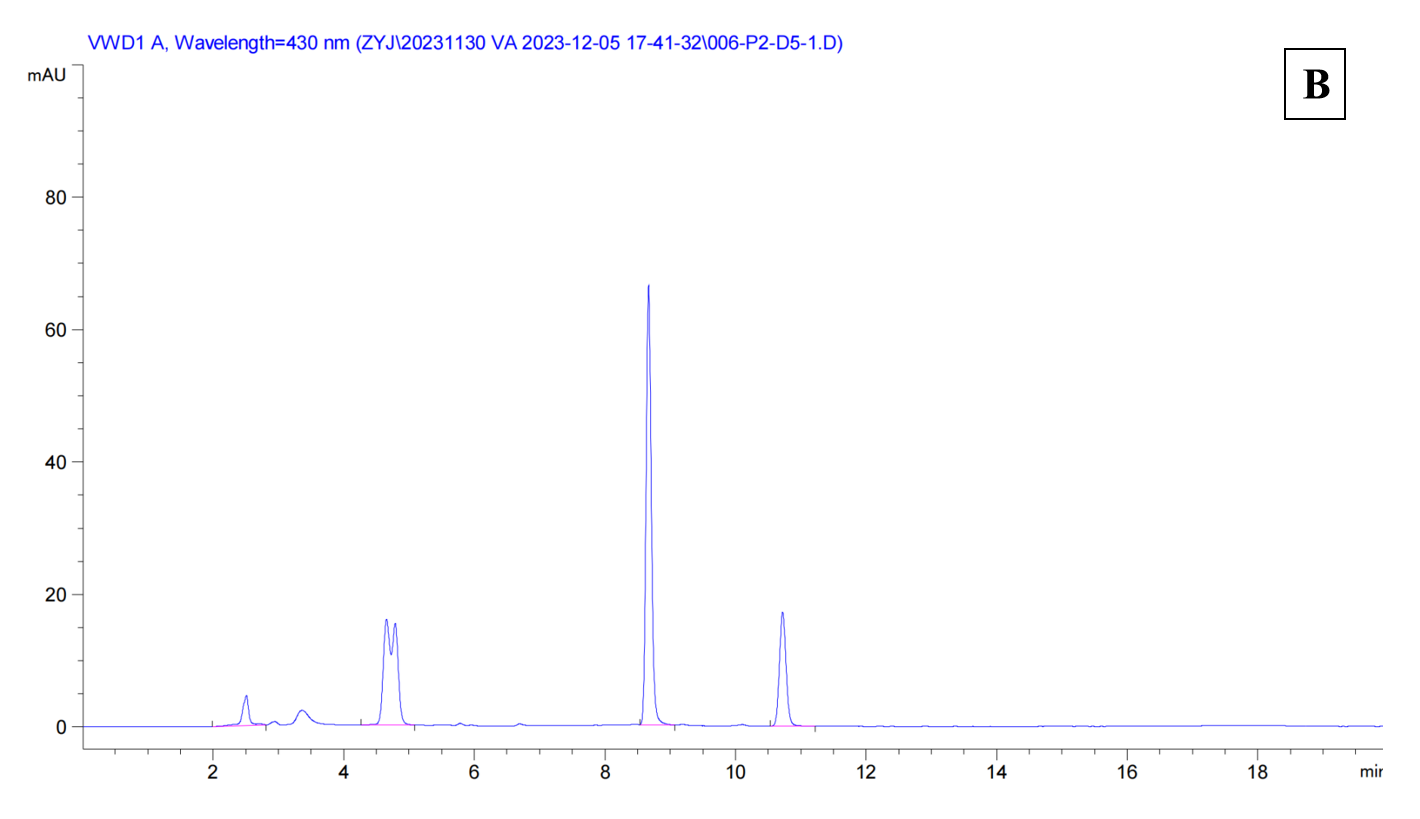


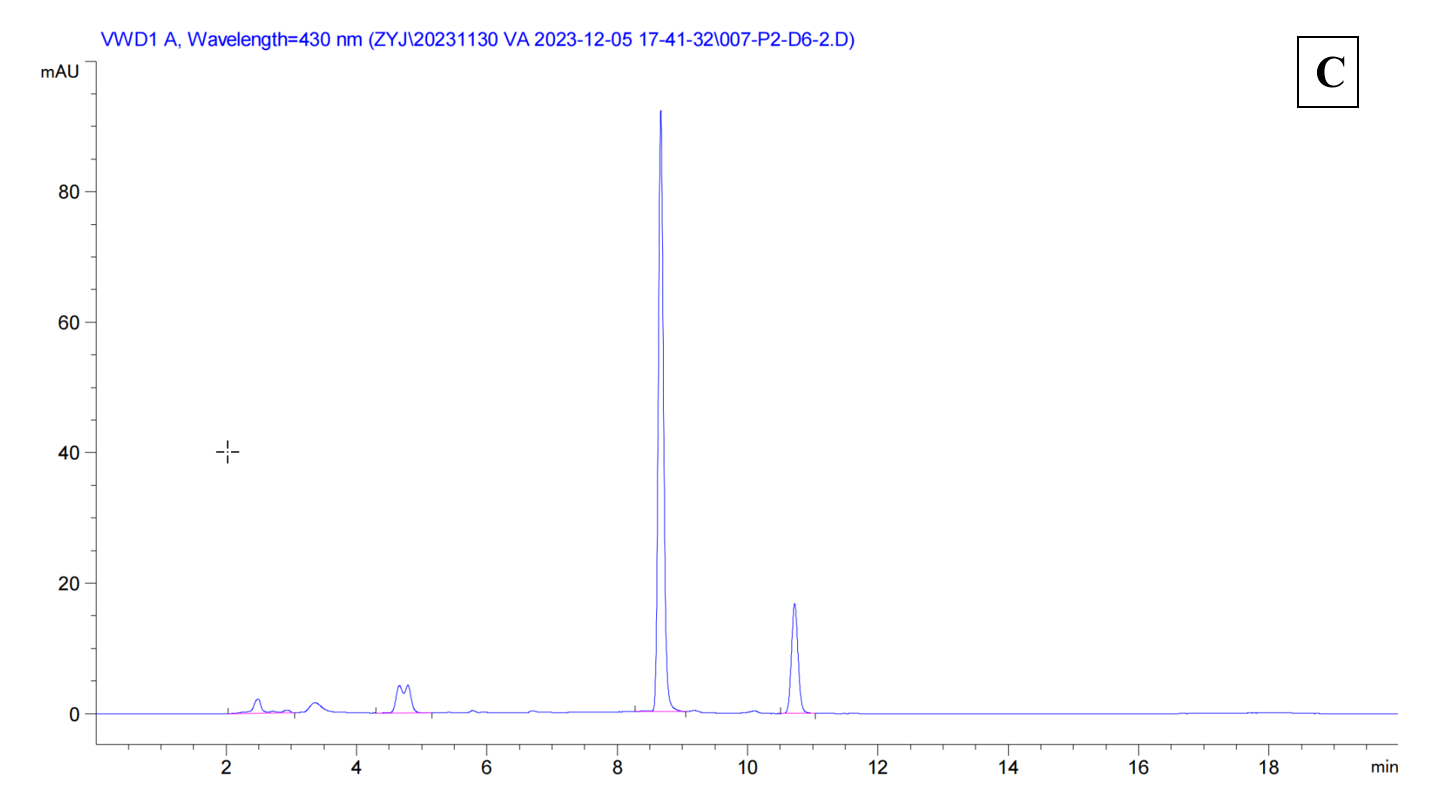


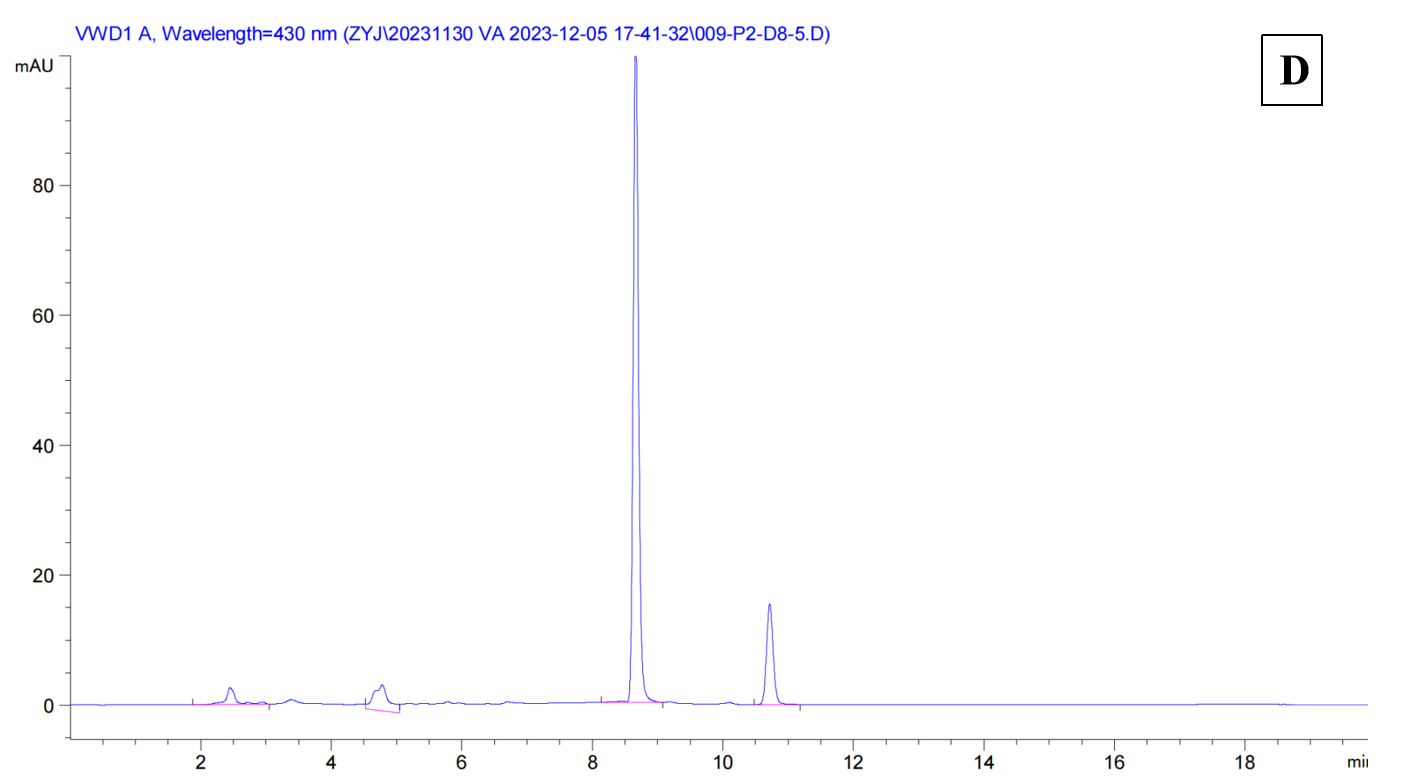


**Figure S1 Chromatograms of plasma samples treated with (A) 0 μL, (B) 1 μL, (C) 2 μL and (D) 5 μL enzymes.**
